# Supplementary material for: Preprocedural SARS-CoV-2 Testing to Sustain Medically Needed Health Care Delivery During the COVID-19 Pandemic: A Prospective Observational Study
Source: Oxford University Press journal article supplement (doi:10.1093/ofid/ofab022), 2021-01-18
Supplement: ofab022_suppl_supplementary_material.docx [file ofab022_suppl_supplementary_material.docx]

**Supplement:**

**Supplementary eTable 1.** **Comprehensive phone questionnaire of academic hospital patients who were SARS-CoV-2 PCR positive.**

**Supplementary eTable 2.** **Outcomes of 11 PCR-positive preprocedural patients.**

| Have you previously been diagnosed with COVID-19? |
| --- |
| In the past 3 months, have you had any contact with someone with COVID-19? |
| In past 3 months, have you traveled outside of PA, and if so where? |
| Have you had any of these symptoms in the past 3 months? |
| a) Fever (> 100.4) |
| b) Conjunctival injection (red eyes) |
| c) Nasal congestion |
| d) Runny nose |
| e) Headache |
| f) Sore throat |
| g) Cough |
| h) Shortness of breath |
| i) Hemoptysis (coughing up blood) |
| j) Fatigue |
| k) Nausea or vomiting |
| l) Diarrhea |
| m) Muscle aches |
| n) Confusion |
| o) Altered smell or loss of smell |
| p) Altered taste or loss of taste |
| Did you have any of these symptoms when you were tested for coronavirus? |
| Do you have any of these symptoms now? |
| How does knowledge of these test results make you feel? |
| Comments from the patient |

**Supplementary eTable 1.** **Comprehensive phone questionnaire of academic hospital patients who were SARS-CoV-2 PCR positive.** PCR positive patients were contacted on 4 separate days throughout the 14-day period following their positive test.

| **Patient** | **Age, yr** | **Sex at birth** | **Race** | **Procedure** | **PCR result prior to procedure** | **PCR result on original procedure date** | **Days between PCR tests** | **Days between initial positive PCR test and original procedure date** | **COVID-19 symptoms** a | **Procedure disposition and clinical outcomes** | **Negative PCR required to clear patient?** | **SARS-CoV-2 IgG and IgA** | **Cycle threshold** |
| --- | --- | --- | --- | --- | --- | --- | --- | --- | --- | --- | --- | --- | --- |
| **Academic hospital (April 21 – June 11)** | | | | | | | | | | | | | | |
| 1 | 59 | F | White | Shoulder arthroscopy | Negative | Positive | 2 | 2 | No COVID-19 symptoms or exposures 3 months before and 2 weeks following the test | Postponed (11 days) | No | Negative (day of procedure) | E no detected;  N2 = 42.2  (Cepheid Xpert Xpress SARS-Cov-2) |
| 2 | 82 | M | White | Hernia repair | Positive | Procedure cancelled | NA | 3 | Asymptomatic when tested. Developed profound fatigue/myalgias 10 days after positive test | Postponed (31 days) | Yes (14 and 27 days after positive PCR) | NP | 30.39  (Abbott RealTime SARS-CoV-2) |
| 3 | 31 | F | White | Spine fusion | Negative | Positive | 6* | 0 | Asymptomatic when tested. Reported a syndrome compatible with COVID-19 3 months before testing | Postponed (6 days) | Yes (0 and 6 days after positive PCR) | Positive (day of procedure) | E not detected;  N2=42.1  (Cepheid Xpert Xpress SARS-Cov-2) |
| **Community hospital (May 1 – June 11)** | | | | | | | | | | | | | | |
| 4 | 15 | F | White | D&C | Positive | Not done | NA | 7 | No symptoms, but was exposed to someone with COVID-19 | Performed as scheduled with no hospitalizations or other complications related to COVID-19 up to 2 weeks after the positive PCR | No | NP | NA |
| 5 | 65 | M | White | I&D | NP | Positive | NA | 0 | 1-week history of cough | Cancelled | NA; died of complications related to COVID-19 pneumonia | NP | NA |
| 6 | 74 | M | White | Infected dialysis catheter removal | Positive | Not done | NA | 1 | None | Performed as scheduled with no hospitalizations or other complications related to COVID-19 up to 2 weeks after the positive PCR | No | NP | NA |
| 7 | 26 | F | Black | C-section | Positive | Not done | NA | 2 | None | Performed as scheduled with no hospitalizations or other complications related to COVID-19 up to 2 weeks after the positive PCR | No | NP | NA |
| 8 | 58 | F | White | Cataract surgery | Positive | Not done | NA | NAc | None | Postponed | Yes (16 days after positive PCR) | NP | NA |
| 9 | 78 | M | White | ORIF of hip | Positiveb | Positive | 19 | 0 | None; was PCR positive on 4 occasions | Performed as scheduled with no hospitalizations or other complications related to COVID-19 up to 2 weeks after the positive PCR | No | NP | NA |
| 10 | 63 | M | White | Cyst removal | Positive | Not done | NA | 3 | None | Cancelled | NA | NP | NA |
| 11 | 80 | F | White | Total knee arthroplasty | Positive | Not done | NA | 3 | None | Postponed (56 days) | Yes (56 days after positive PCR) | NP | NA |

**Supplementary eTable 2.** **Outcomes of 11 PCR positive pre-procedural patients.**

COVID-19, coronavirus disease 19; D&C, dilation and curettage; E, envelope gene; I&D, incision and drainage; N2, nucleocapsid 2 gene; NA, not applicable; NP, not performed; ORIF, Open reduction internal fixation; PCR, polymerase chain reaction.

*Patient’s initial PCR was supposed to be scheduled within 4 days prior to the procedure, but an exception had to made as the patient was unable to be tested during that window.

aFor academic hospital patients, symptom assessment via a phone interview (supplemental eTable1) was conducted 4 times up to 14 days after the initial positive PCR test. For community hospital patients, symptoms were extracted from the electronic medical record.

bPatient 9 had undergone PCR testing 19 days prior to his ORIF in the setting of a shoulder dislocation and a high-risk exposure. He was PCR positive on 4 occasions, including the day prior to the ORIF, when he was retested as part of the pre-procedural testing initiative.

cDate of original procedure could not be found.

dEuroimmun assay; drawn per physician discretion.
